# Supplementary material for: HpARI Protein Secreted by a Helminth Parasite Suppresses Interleukin-33
Source: PubMed Central journal article supplement (PMC5655542; doi:10.1016/j.immuni.2017.09.015), 2017-10-17
Supplement: mmc1.pdf [file mmc1.pdf]

## Supplemental Information

### HpARI Protein Secreted by a Helminth Parasite

### Suppresses Interleukin-33

Megan Osbourn, Dinesh C. Soares, Francesco Vacca, E. Suzanne Cohen, Ian C. Scott, William F. Gregory, Danielle J. Smyth, Matilda Toivakka, Andrea M. Kemter, Thierry le Bihan, Martin Wear, Dennis Hoving, Kara J. Filbey, James P. Hewitson, Holly Henderson, Andrea González-Ciscar, Claire Errington, Sonja Vermeren, Anne L. Astier, William A. Wallace, Jürgen Schwarze, Alasdair C. Ivens, Rick M. Maizels, and Henry J. McSorley

|                           | Blast hit                                                                                                                                                                          | Size fraction 11 |                      |                            | Charge fraction 25 |                      |                            |
|---------------------------|------------------------------------------------------------------------------------------------------------------------------------------------------------------------------------|------------------|----------------------|----------------------------|--------------------|----------------------|----------------------------|
|                           |                                                                                                                                                                                    | emPAI            | Mascot protein score | Rank (of 194) <sup>a</sup> | emPAI              | Mascot protein score | Rank (of 262) <sup>a</sup> |
| Hp_I10793_IG03481_L623    | No BLASTX similarities 13330478:13331100 forward                                                                                                                                   | 1.35             | 99                   | 57                         | 0.53               | 104                  | 77                         |
| Hp_I15874_IG07818_L1106   | BLASTX similarity to 66.67% ID to CBN-NUC-1 protein [Caenorhabditis brenneri] (376 aa, Accession: gi 341901954 gb EGT57889.1)                                                      | 1.11             | 229                  | 19                         | 5.23               | 786                  | 2                          |
| Hp_I46029_IG37973_L313    | BLASTX similarity to 55.93% ID to unnamed protein product [Homo sapiens] (304 aa, Accession: gi 189069304 dbj BAG36336.1)                                                          | 2.01             | 67                   | 90                         | 0.73               | 50                   | 163                        |
| Hp_I08176_IG02172_L1157   | BLASTX similarity to 72.38% ID to PHA domain [Heligmosomoides polygyrus bakeri] (252 aa, Accession: gi 345499002 emb CCC54333.1)                                                   | 0.13             | 61                   | 100                        | 1.05               | 353                  | 18                         |
| GSXTT4C07IB13H_length=463 | BLASTX similarity to 86.32% ID to venom allergen/ ancylostoma secreted protein-like 1 isoform 4 [Heligmosomoides polygyrus bakeri] (459 aa, Accession: gi 348659354 gb AEP82914.1) | 0.53             | 59                   | 105                        | 2.58               | 246                  | 1                          |
| Hp_I00796_IG00050_L1763   | BLASTX similarity to 60.51% ID to metalloprotease 1 precursor [Ancylostoma ceylanicum] (547 aa, Accession: gi 23268453 gb AAN11401.1)                                              | 0.37             | 163                  | 32                         | 0.78               | 518                  | 3                          |
| Hp_I03365_IG00388_L986    | BLASTX similarity to 83.05% ID to putative ES protein F7 [Ostertagia ostertagi] (181 aa, Accession: gi 18104159 emb CAD20464.1)                                                    | 0.2              | 73                   | 80                         | 3.37               | 408                  | 14                         |
| Hp_I05355_IG00918_L1570   | BLASTX similarity to 61.84% ID to astacin-like metalloprotease [Haemonchus contortus] (502 aa, Accession: gi 82653303 emb CAJ43810.1)                                              | 0.51             | 205                  | 20                         | 0.34               | 137                  | 20                         |
| Hp_I07496_IG01832_L2183   | BLASTX similarity to 49.47% ID to metalloprotease I [Ostertagia ostertagi] (573 aa, Accession: gi 25005280 emb CAD28559.2)                                                         | 0.23             | 184                  | 24                         | 0.52               | 300                  | 26                         |
| Hp_I09193_IG02681_L996    | BLASTX similarity to 27.72% ID to Chain A, Caclcium-Bound Ac-Asp-7 (206 aa, Accession: gi 383875397 pdb 3S6U A)                                                                    | 0.2              | 78                   | 72                         | 1.28               | 312                  | 24                         |
| Hp_I09338_IG02753_L893    | BLASTX similarity to 69.57% ID to Chain A, Glutathione Transferase-2, Apo Form, From The Nematode Heligmosomoides Polygyrus (206 aa, Accession: gi 51247756 pdb 1TW9 A)            | 0.36             | 81                   | 60                         | 0.23               | 90                   | 59                         |
| Hp_I12757_IG04701_L2227   | BLASTX similarity to 69.27% ID to hypothetical protein CAEBREN_19315 [Caenorhabditis brenneri] (713 aa, Accession: gi 341886485 gb EGT42420.1)                                     | 0.9              | 321                  | 9                          | 0.29               | 119                  | 67                         |
| Hp_I12915_IG04859_L2071   | BLASTX similarity to 74.56% ID to hypothetical protein CAEBREN_01953 [Caenorhabditis brenneri] (594 aa, Accession: gi 341889762 gb EGT45697.1)                                     | 0.25             | 146                  | 39                         | 0.43               | 190                  | 39                         |
| Hp_I13075_IG05019_L1949   | BLASTX similarity to 25.30% ID to GD14343 [Drosophila simulans] (699 aa, Accession: gi 195589672 ref XP_002084573.1)                                                               | 0.71             | 317                  | 10                         | 1.15               | 478                  | 8                          |
| Hp_I13426_IG05370_L1731   | BLASTX similarity to 61.51% ID to hexokinase [Haemonchus contortus] (485 aa, Accession: gi 4583627 emb CAB40412.1)                                                                 | 1.51             | 564                  | 4                          | 0.81               | 409                  | 13                         |
| Hp_I13832_IG05776_L1555   | BLASTX similarity to 59.25% ID to metalloprotease III [Ostertagia ostertagi] (507 aa, Accession: gi 21425408 emb CAD19995.2)                                                       | 0.6              | 152                  | 38                         | 0.9                | 340                  | 20                         |
| Hp_I14648_IG06592_L1319   | No BLASTX similarities 18271778:18273096 forward                                                                                                                                   | 1.67             | 280                  | 15                         | 0.75               | 180                  | 41                         |
| Hp_I14766_IG06710_L1294   | BLASTX similarity to 42.09% ID to Hyaluronidase-1, partial [Ascaris suum] (439 aa, Accession: gi 324516157 gb ADY46439.1)                                                          | 0.15             | 57                   | 109                        | 0.42               | 96                   | 86                         |
| Hp_I15012_IG06956_L1244   | BLASTX similarity to 71.51% ID to hypothetical protein CRE_02222 [Caenorhabditis remanei] (368 aa, Accession: gi 308509410 ref XP_003116888.1)                                     | 0.56             | 167                  | 21                         | 0.25               | 138                  | 57                         |
| Hp_I15720_IG07664_L1128   | BLASTX similarity to 83.79% ID to hypothetical protein CRE_30062 [Caenorhabditis remanei] (425 aa, Accession: gi 308473183 ref XP_003098817.1)                                     | 0.5              | 180                  | 26                         | 0.28               | 88                   | 99                         |
| Hp_I15761_IG07705_L1121   | BLASTX similarity to 78.44% ID to hypothetical protein CAEBREN_23086 [Caenorhabditis brenneri] (322 aa, Accession: gi 341889746 gb EGT45681.1)                                     | 0.18             | 41                   | 144                        | 1.47               | 368                  | 16                         |
| Hp_I16083_IG08027_L1071   | BLASTX similarity to 28.20% ID to Complement factor H [Ascaris suum] (1358 aa, Accession: gi 324499597 gb ADY39830.1)                                                              | 0.41             | 72                   | 85                         | 0.19               | 42                   | 186                        |
| Hp_I28418_IG20362_L498    | BLASTX similarity to 45.24% ID to hypothetical protein CRE_02231 [Caenorhabditis remanei] (147 aa, Accession: gi 308510374 ref XP_003117370.1)                                     | 0.43             | 42                   | 141                        | 0.43               | 67                   | 122                        |
| Hpb-APY-2                 | No BLASTX analysis performed; (File Apyrase 124-3 (iso 07051) 081110) 1062 nt                                                                                                      | 5.9              | 654                  | 2                          | 0.3                | 58                   | 137                        |
| Hpb-GST-2                 | No BLASTX analysis performed; partial (no N-terminus) AF128959                                                                                                                     | 1.07             | 96                   | 60                         | 0.79               | 138                  | 59                         |

a) Rank of 194 proteins in size fraction 11 or 262 candidates in charge fraction 25 determined by Mascot score, with a minimum score of 20

### Supplementary Table 1 (related to Figure 1):

Candidate genes with emPAI peaking in size fractions 10-12 and charge fraction 23-27. Data shown for peak IL-33 suppressive fraction (size = 11, charge = 25).

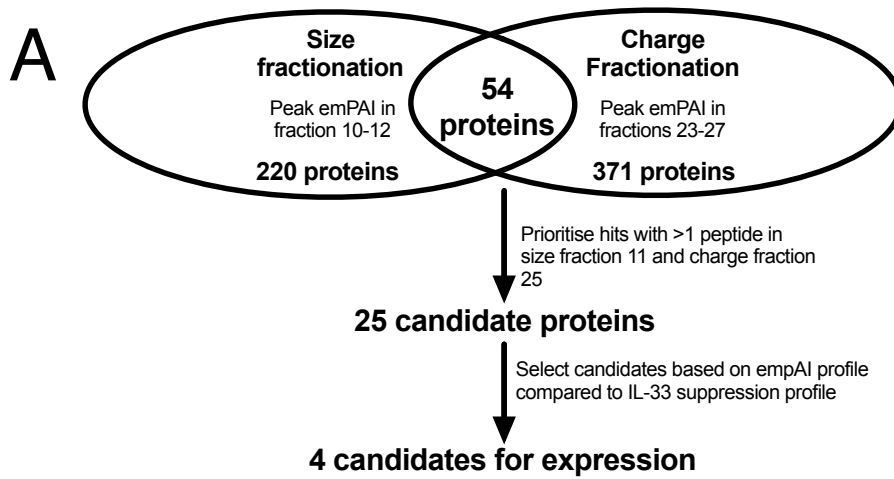

**B**

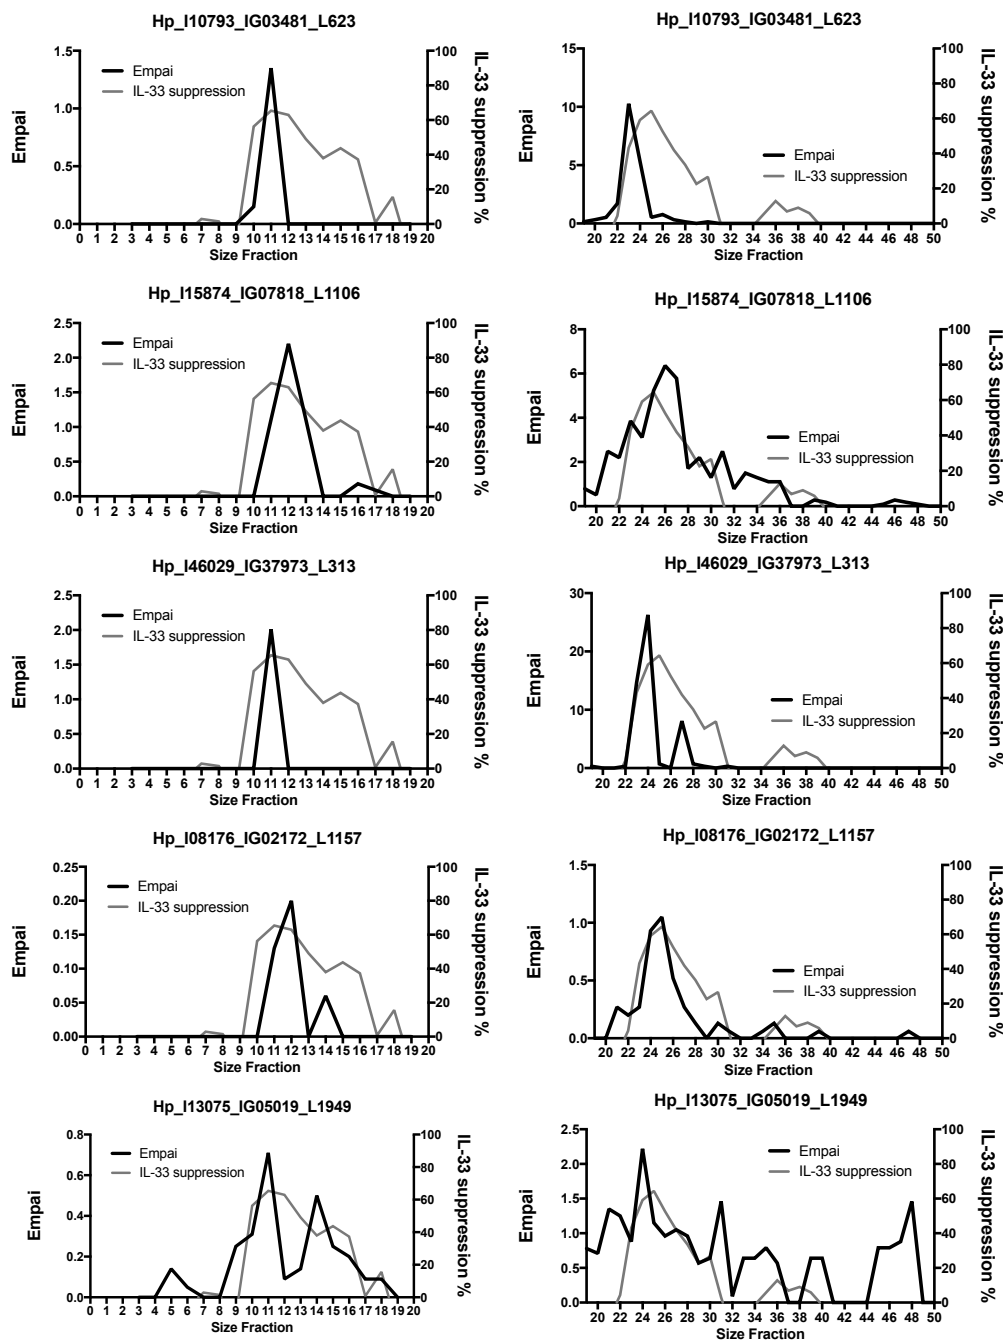

**Supplementary Figure 1 (Related to Figure 1):**

A. Candidate protein selection strategy

B. Candidate protein Empai profile and IL-33 suppression profile in HES size (left panels) and charge (right panels) fractions. The 4 candidate proteins tested in Fig 2A are shown followed by a candidate not selected for further testing (Hp\_I13075\_IG05019\_L1949), for comparison.

A

|     |                                                              |     |
|-----|--------------------------------------------------------------|-----|
| 0   | atgtatcgcccttttctcgcttaggcttcctcacctcatcaacgctgcaggtcagcgc   | 60  |
| 0   | M Y R L F L A L G F L T F I N A A G O R                      | 20  |
| 61  | tgcagattcacccgatgtagaaagagacaaaggctacactggaatgctccttaaggaagc | 120 |
| 21  | C R F T D V E R D K G Y T G M L L K G R                      | 40  |
| 121 | ttaagaaagacagctggaaacgggaggacggtagaattgatatgtggaagaggaaatcac | 180 |
| 41  | L R K T A G N G R T V E L I C G R G N H                      | 60  |
| 181 | aactacacctgcgagtcggcgcttttgaaggaaagtctccacggcaagcccgatgtggc  | 240 |
| 61  | N Y T C E S G V L K E S S P R O A R C G                      | 80  |
| 241 | tgcaaggaattctcgaatgctcttcgatatgcctaaggaagaacggccctcgccctag   | 300 |
| 81  | C K G I L E M L F D M P K E E R P S P M                      | 100 |
| 301 | tacgactcagtcacctatgaccccacgccaacaccccaacaactgtaggaaaggacggc  | 360 |
| 101 | Y D S V T Y D P T P N T P T T V G K D G                      | 120 |
| 361 | atatggaacgggtagattaccgcaatggctctacagtgaagccttattgcgatactggc  | 420 |
| 121 | I W N G V D Y R N G S T V K P Y C D T G                      | 140 |
| 421 | ccagtcatcaacggatcatcaaagctgtatgtgtgagtggaatgggttcctacgctt    | 480 |
| 141 | P V I N G S S K A V C V S G K W V P T L                      | 160 |
| 481 | ggcgtctgcccaaaaatgtgttcgatcggcagcttgaaggaaaatgggaaattcgtagac | 540 |
| 161 | G V C P K M C S I G S L K E N G K F V D                      | 180 |
| 541 | gtcacagcaacaactaaaggagacgagctcaacccccgccaaggaacagacattgatt   | 600 |
| 181 | V T A T T K G D E L N P P P R E Q T L I                      | 200 |
| 601 | cctatagtgcgtaaagttgacaaagacaaggtccaacacggcgtcaaagttgttgctctt | 660 |
| 201 | P I V R K V D K D K V O H G V K V V A L                      | 220 |
| 661 | tgtaaagccgaagattctacaactgccgctgaaggcgtccaggaattcgaatgtgacaac | 720 |
| 221 | C K A E D S T T A A E G V O E F E C D N                      | 240 |
| 721 | gggaagtggaagccagagcccgtgccctgccctaa                          | 756 |
| 241 | G K W K P E P V P C P -                                      | 251 |

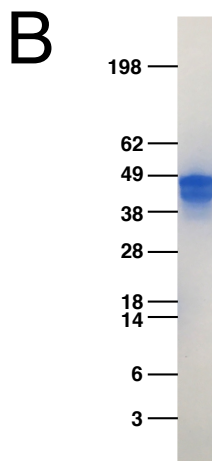

**Supplementary Figure 2 (Related to Figure 2):**

- A. HpARI cDNA sequence showing intron/exon boundaries (green/yellow highlight) and amino acid domains (coloured boxes/text, red = signal peptide, green = CCP1, salmon = CCP2, pink = CCP3)
- B. Coomassie-stained purified HpARI (2 µg), purified by nickel affinity chromatography.

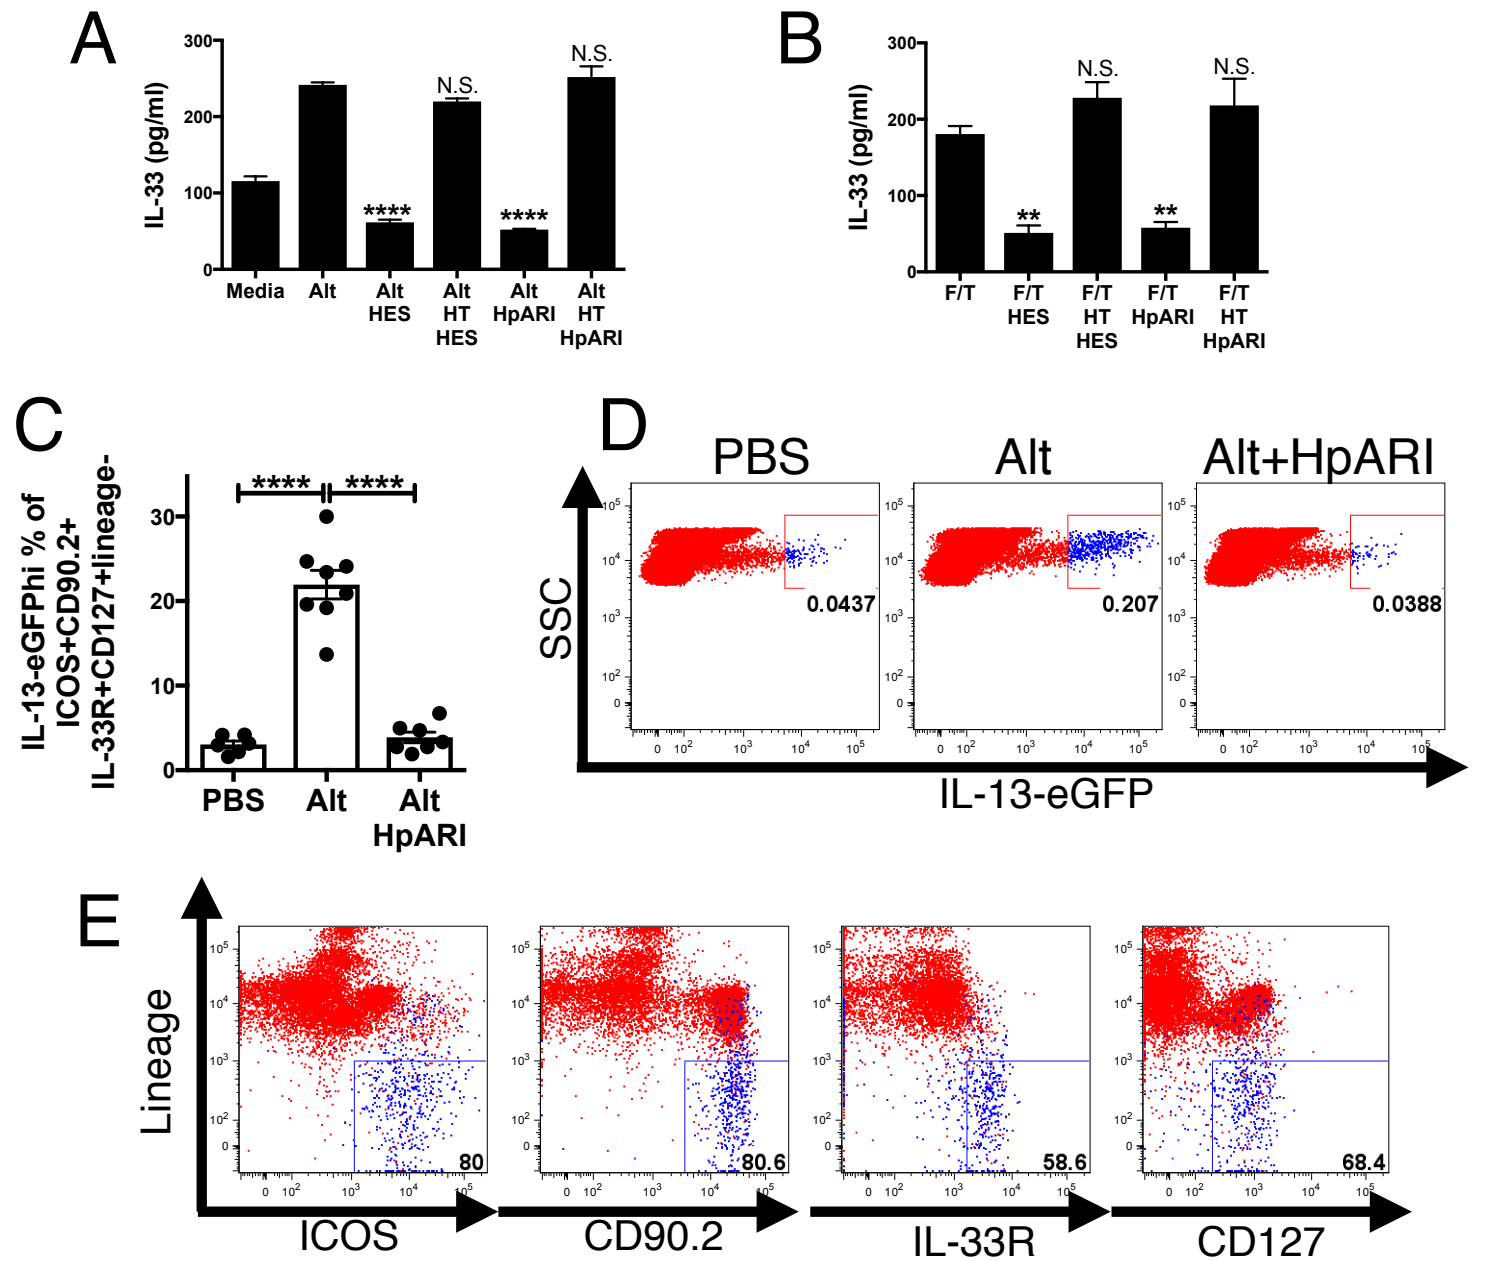

**Supplementary Figure 3 (Related to Figure 3):**

- (A) Naive mouse lung cells were cultured in the presence of *Alternaria* (200  $\mu\text{g/ml}$ ) and 10  $\mu\text{g/ml}$  HES or HpARI for 1 h or heat-treated (95°C for 30 min) HES or HpARI (HT HES or HT HpARI). IL-33 in supernatants was measured by ELISA.
- (B) Naive murine lung cells were subjected to freeze/thaw treatment (F/T) in the presence of HES, HpARI, HT HES or HT HpARI. IL-33 in supernatants was measured by ELISA.
- \*\*\*\* =  $p < 0.0001$ , \*\* =  $p < 0.01$ , N.S. = Not significant ( $p > 0.05$ ), compared to *Alternaria* or freeze/thaw (F/T) control. Standard error of means of 3 replicates, representative of 2-3 repeat experiments.
- (C) IL-13-eGFP<sup>hi</sup> proportion of ICOS+CD90.2+IL-33R+CD127+lineage<sup>-</sup> ILC2s in the lung, 24 h after intranasal administration of *Alternaria* allergen and HpARI to IL-13-eGFP reporter mice. Results pooled from 2 repeat experiments. \*\*\*\* =  $p < 0.0001$
- (D) Representative FACS plots of IL-13-eGFP in live CD45+ lung lymphocytes from mouse shown in (C)
- (E) Representative FACS plots of IL-13-eGFP<sup>hi</sup> cells (blue) and total CD45+ live lung lymphocytes (red) from an *Alternaria*-treated IL-13-eGFP reporter mouse.

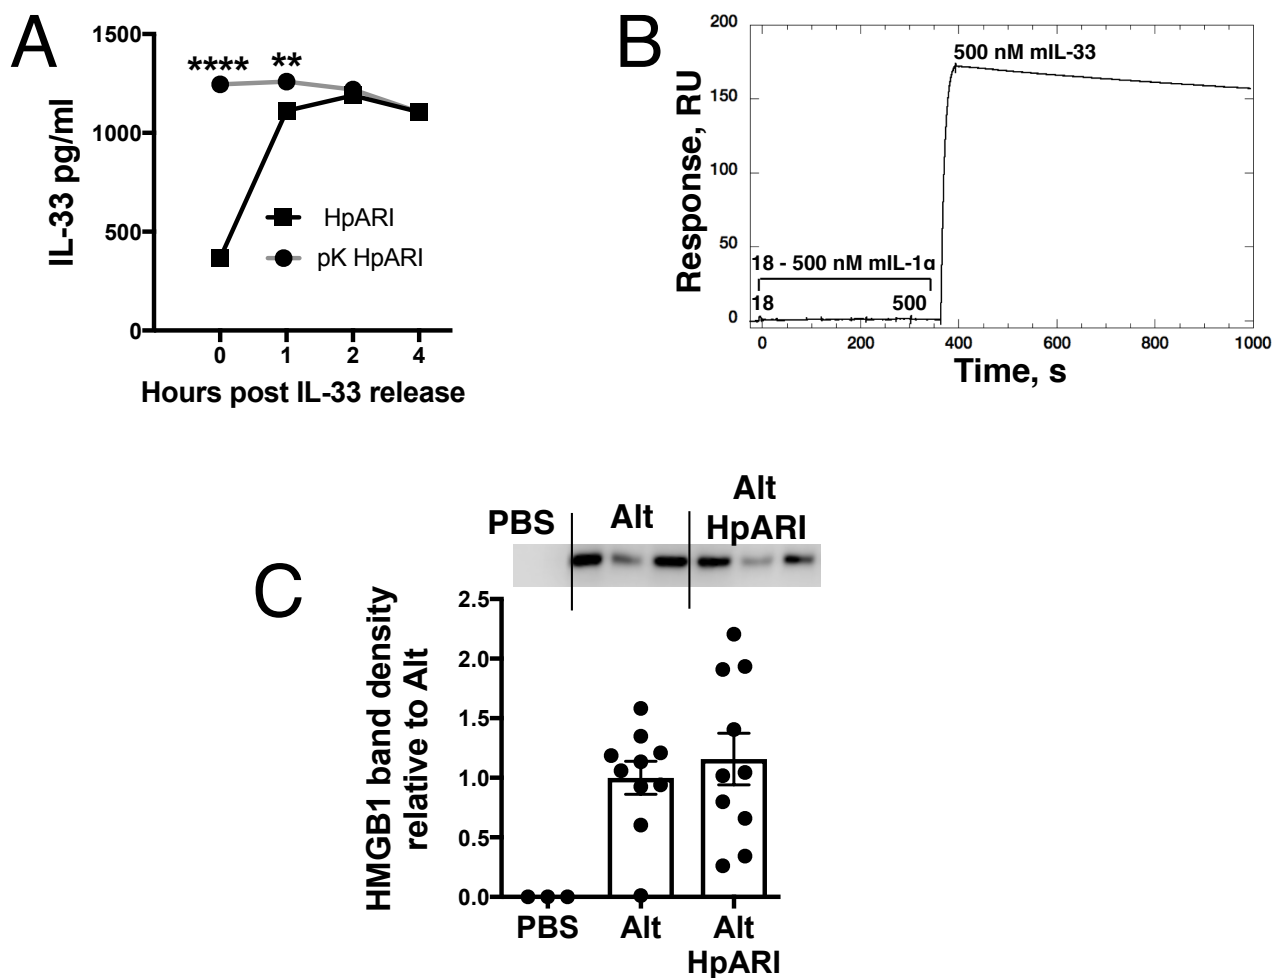

**Supplementary Figure 4 (Related to Figure 5):**

(A) CMT-64 cell supernatants were taken after freeze-thaw and treated with HpARI or proteinase K-digested and heat-treated HpARI over a timecourse after thaw, as in Figure 5C

(B) Surface plasmon resonance was carried out using mIL-1a or mIL-33 as a ligand for HpARI.

(C) HMGB1 western blots taken 15 min after Alternaria +/- HpARI administration. Pooled from 3 replicate experiments.

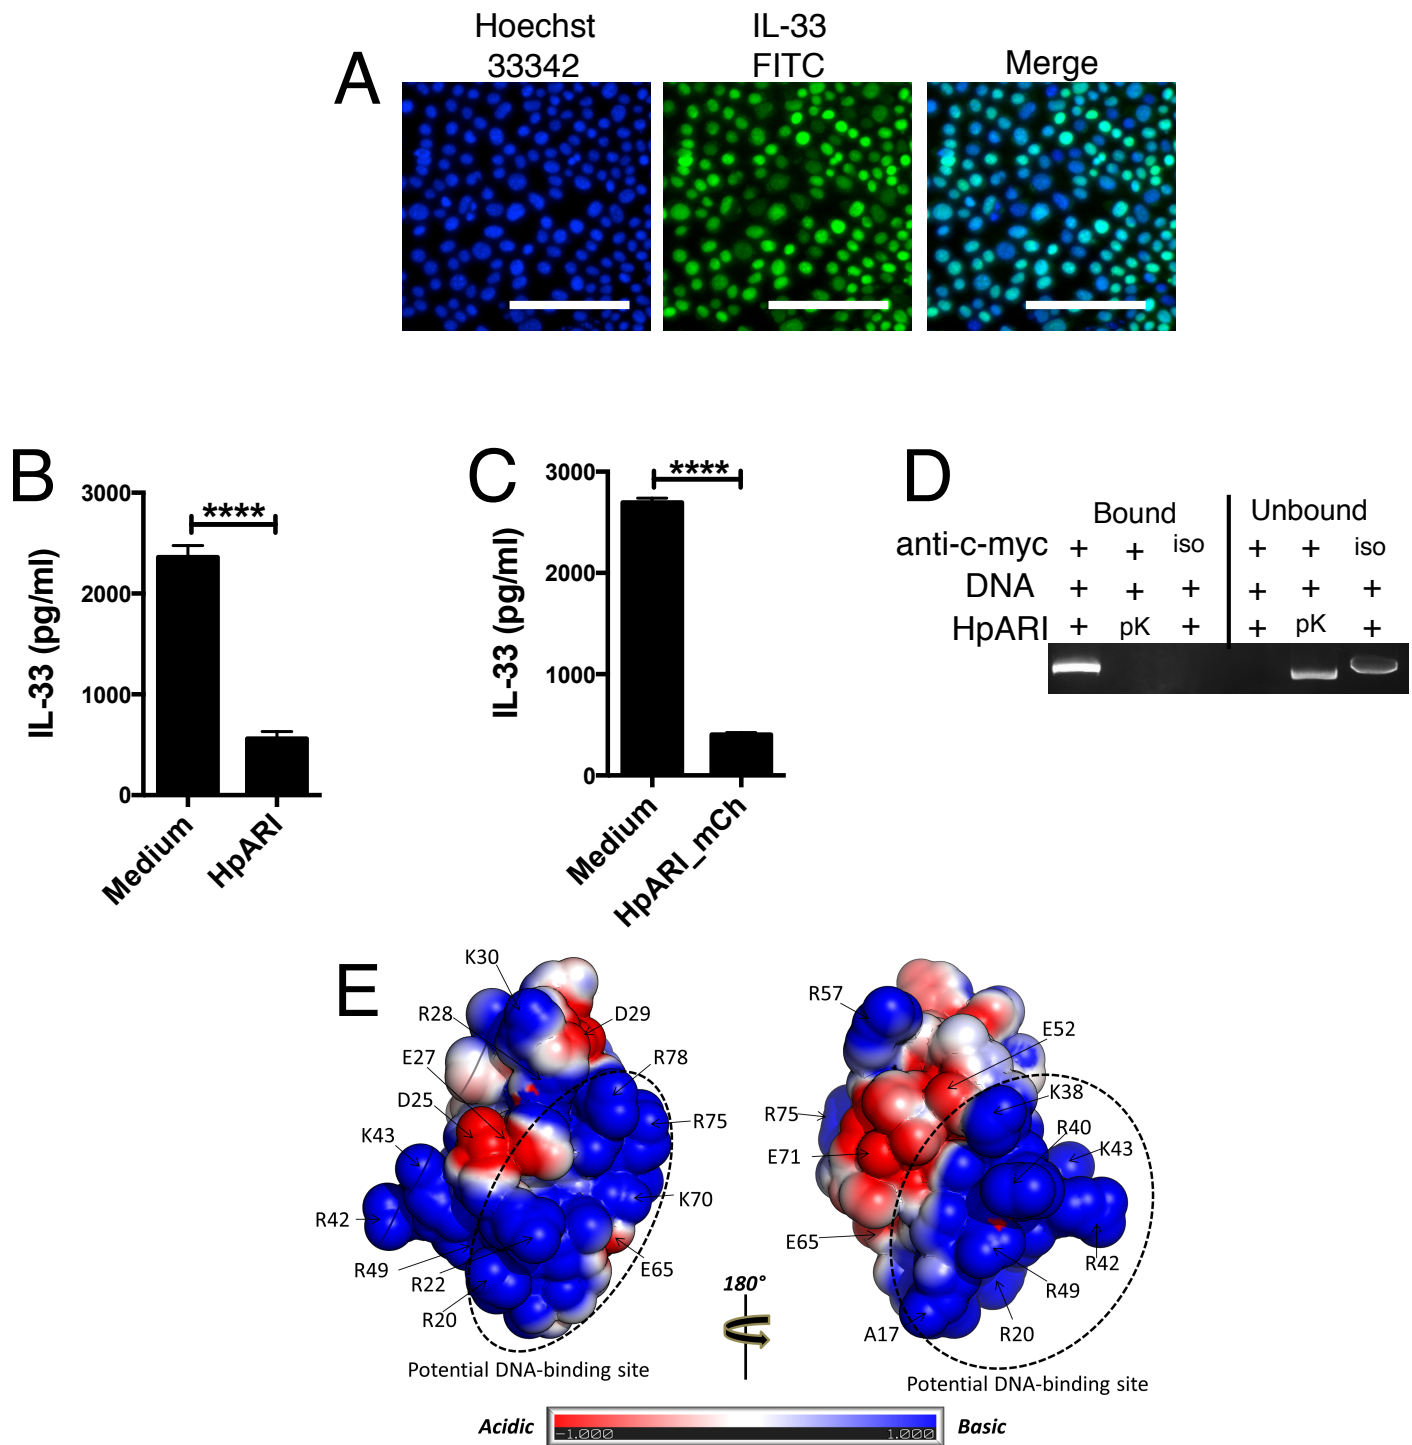

**Supplementary Figure 5 (Related to Figure 7):**

- (A)** CMT-64 cells were fixed and permeabilised, before staining with goat anti-mouse IL-33, followed by rabbit anti-goat IgG FITC secondary and counterstained with Hoechst 33342 nuclear stain. Scale bars indicate 100  $\mu$ m.
- (B)** CMT-64 cells were subjected to freeze/thaw necrosis in the presence of 5  $\mu$ g/ml HpARI and IL-33 in the supernatant measured by ELISA.
- (C)** CMT-64 cells were subjected to freeze/thaw necrosis in the presence of 5  $\mu$ g/ml HpARI\_mCherry and IL-33 in the supernatant measured by ELISA. \*\*\*\* =  $p < 0.0001$
- (D)** Immunoprecipitation of plasmid DNA by myc-tagged HpARI, but not by proteinase K and heat treated HpARI (pK) nor with isotype control antibody.
- (E)** Two views rotated by 180° along the y-axis depicting the electrostatic surface map of the 3-D model of HpARI CCP1 (calculated using APBS) revealing key residues contributing to the highly basic surface (coloured blue) that may confer DNA-binding properties; acidic surface residues are shown in red. A scaled range of -1kT to +1 kT was used, where k=Boltzman's constant and T= Temperature in Kelvins.
